# Supplementary material for: The design of multi-functional ionic hydrogels with anti-freezing, temperature response and luminescence properties
Source: Royal Society of Chemistry journal article supplement (doi:10.1039/d4tc00775a), 2024-01-01
Supplement: d4tc00775a1.pdf [file d4tc00775a1.pdf]

## The design of multi-functional ionic hydrogels with anti-Freezing, temperature response and luminescence properties

Yutong Ding<sup>1</sup>, Weikun Xu<sup>1</sup>, Tairong Kuang<sup>1</sup>, Mi Ouyang<sup>1</sup>, Feng Chen<sup>1</sup>. \*

<sup>1</sup>College of Material Science and Engineering, Zhejiang University of Technology,  
Hangzhou, P. R. China.

\*Corresponding author: F. Chen (Email: Chenf@zjut.edu.cn).

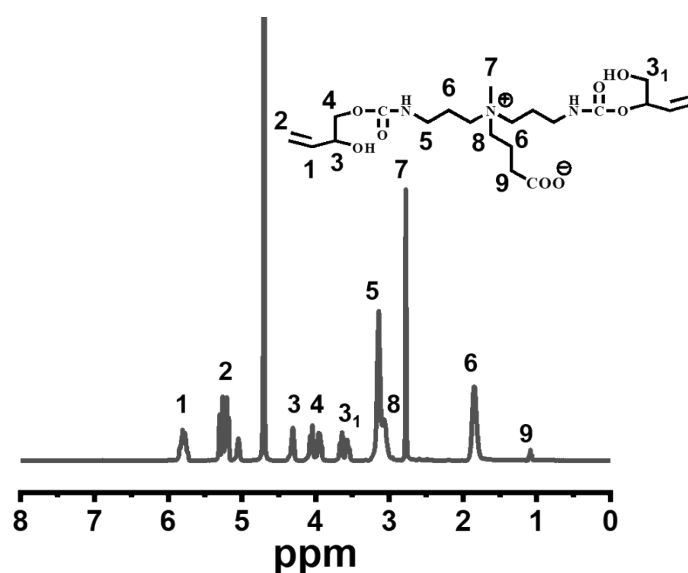

Supplementary Figure S1. <sup>1</sup>H-NMR spectrum of CNPU.

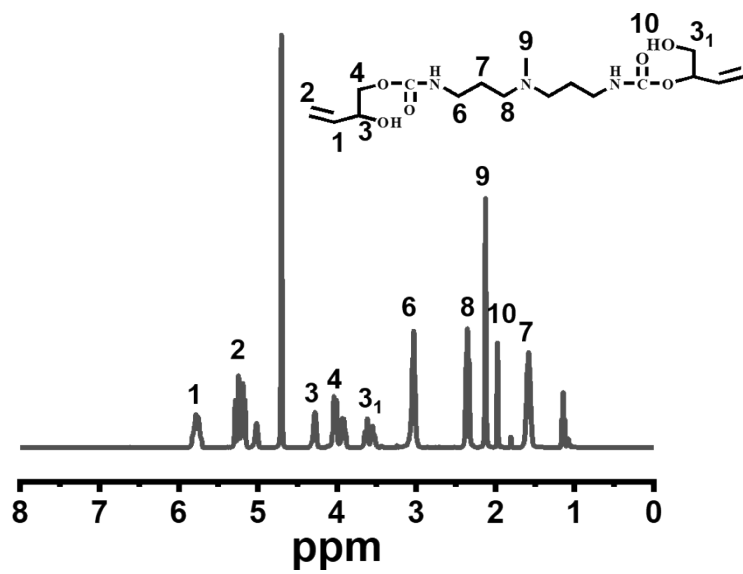

Supplementary Figure S2. <sup>1</sup>H-NMR spectrum of precursor.

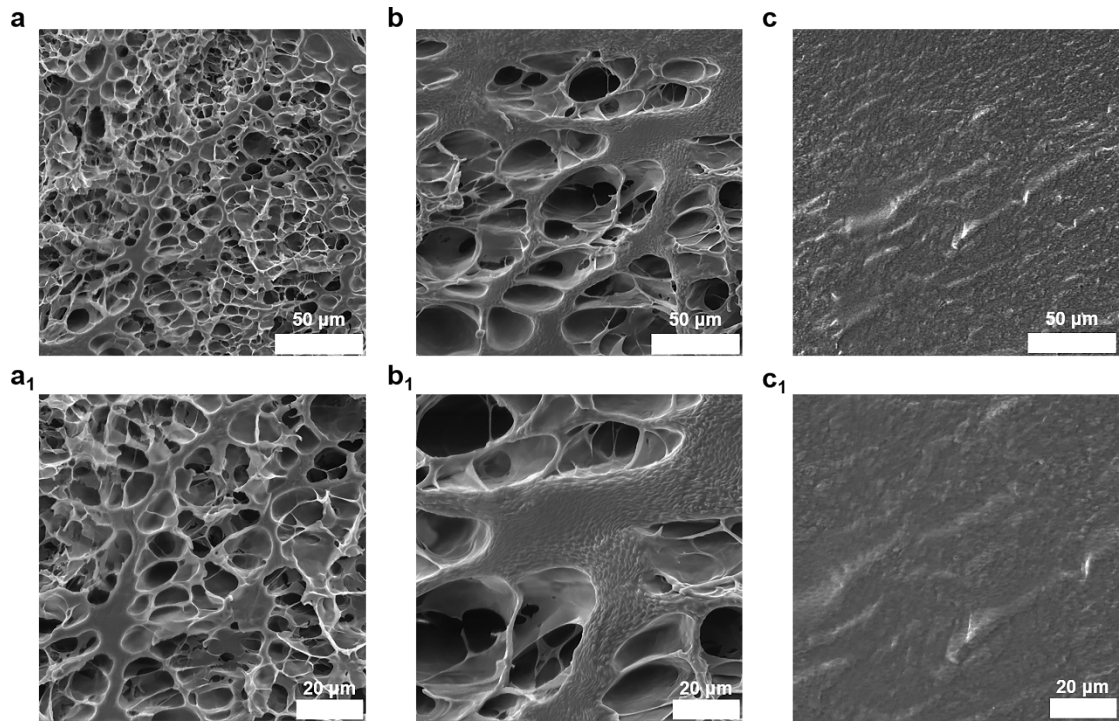

Supplementary Figure S3. SEM images of  $N_xA_0$ : (a, a<sub>1</sub>)  $N_1A_0$ , (b, b<sub>1</sub>)  $N_2A_0$ , (c, c<sub>1</sub>)  $N_3A_0$ .

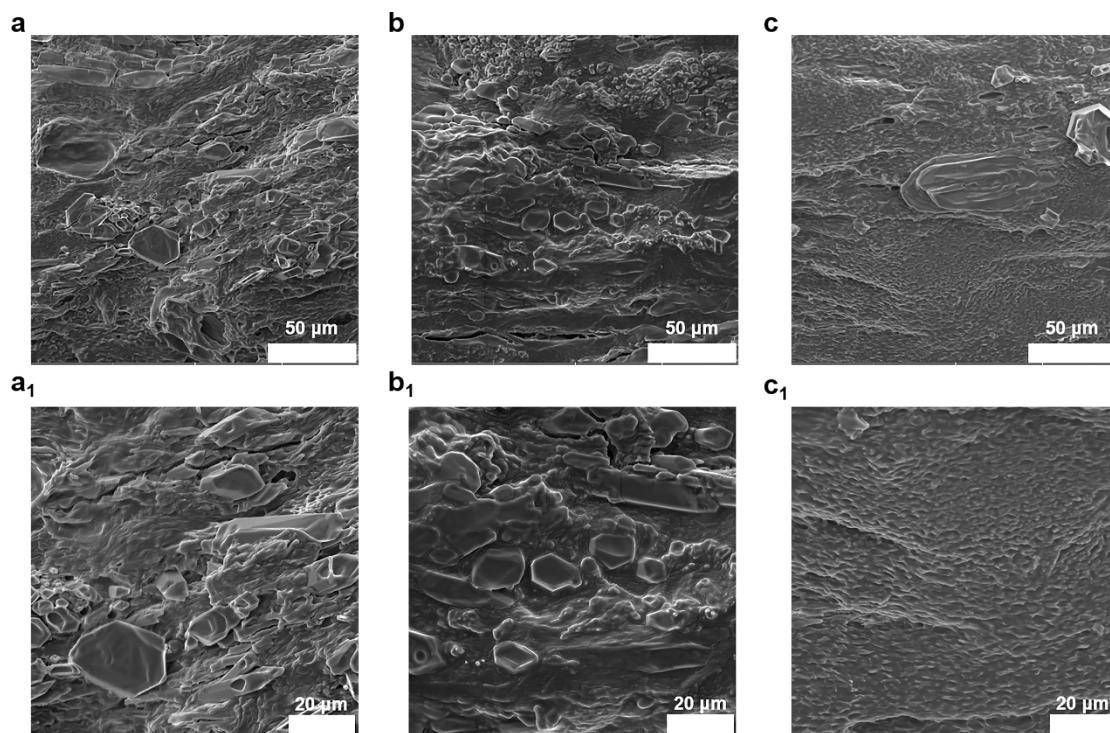

Supplementary Figure S4. SEM images of  $N_xA_1$ : (a, a<sub>1</sub>)  $N_1A_1$ , (b, b<sub>1</sub>)  $N_2A_1$ , (c, c<sub>1</sub>)  $N_3A_1$ .

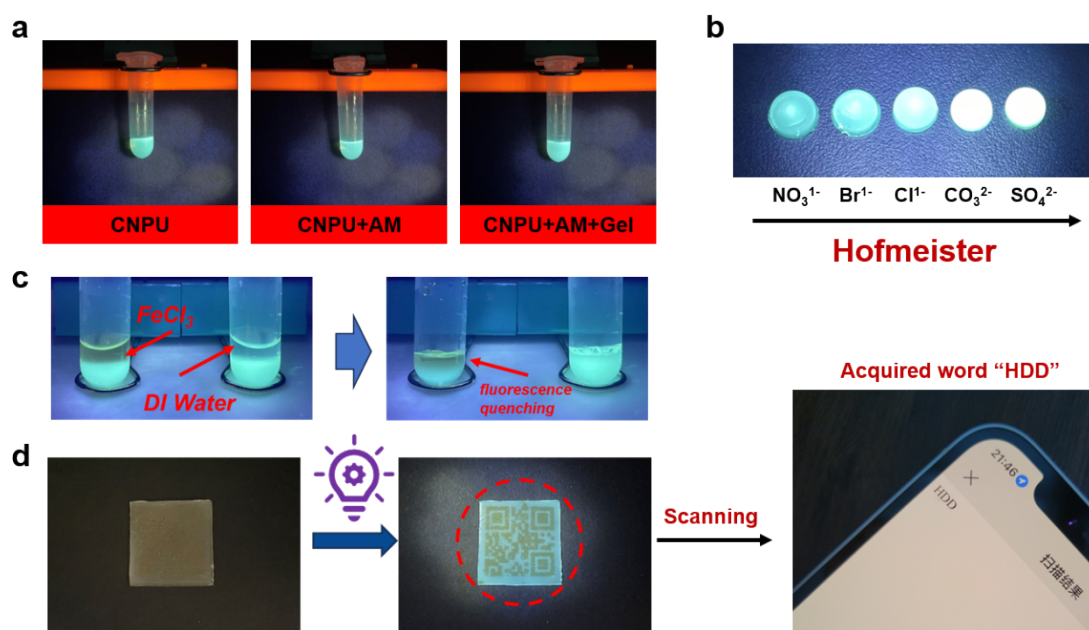

**Supplementary Figure S5.** (a) Luminescence properties of different component samples. (b) Luminescence properties of samples soaked in different salt solutions. (c) Fluorescence quenching by  $\text{Fe}^{3+}$ . (d) The QR codes were ionprinted onto the surface of hydrogels, which can be scanned and accessing to the words "HDD".

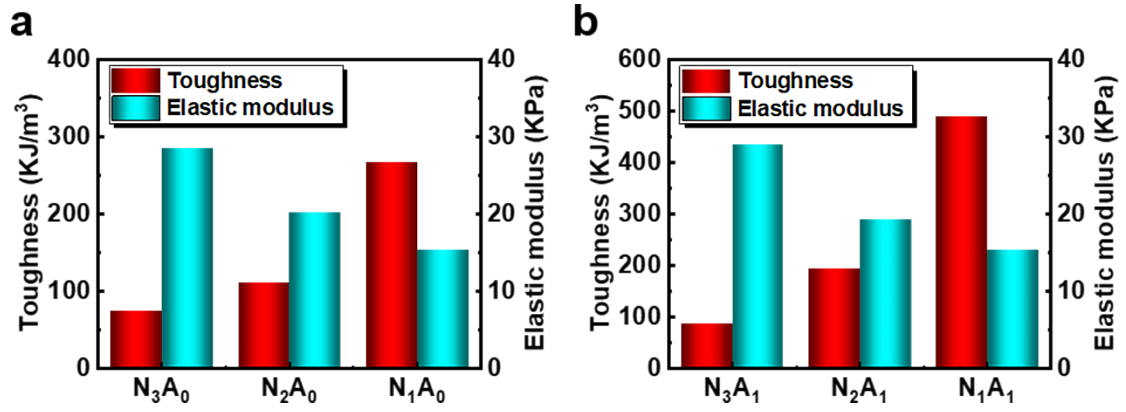

**Supplementary Figure S6.** (a) Toughness and elastic modulus of N<sub>x</sub>A<sub>0</sub>. (b) Toughness and elastic modulus of N<sub>x</sub>A<sub>1</sub>.

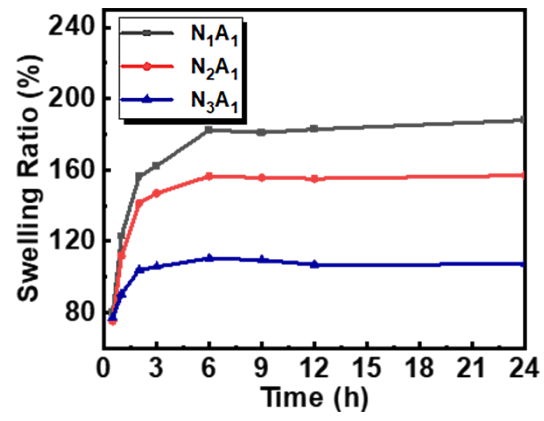

**Supplementary Figure S7.** The swelling ratio of hydrogels with different ratio of CNPU.

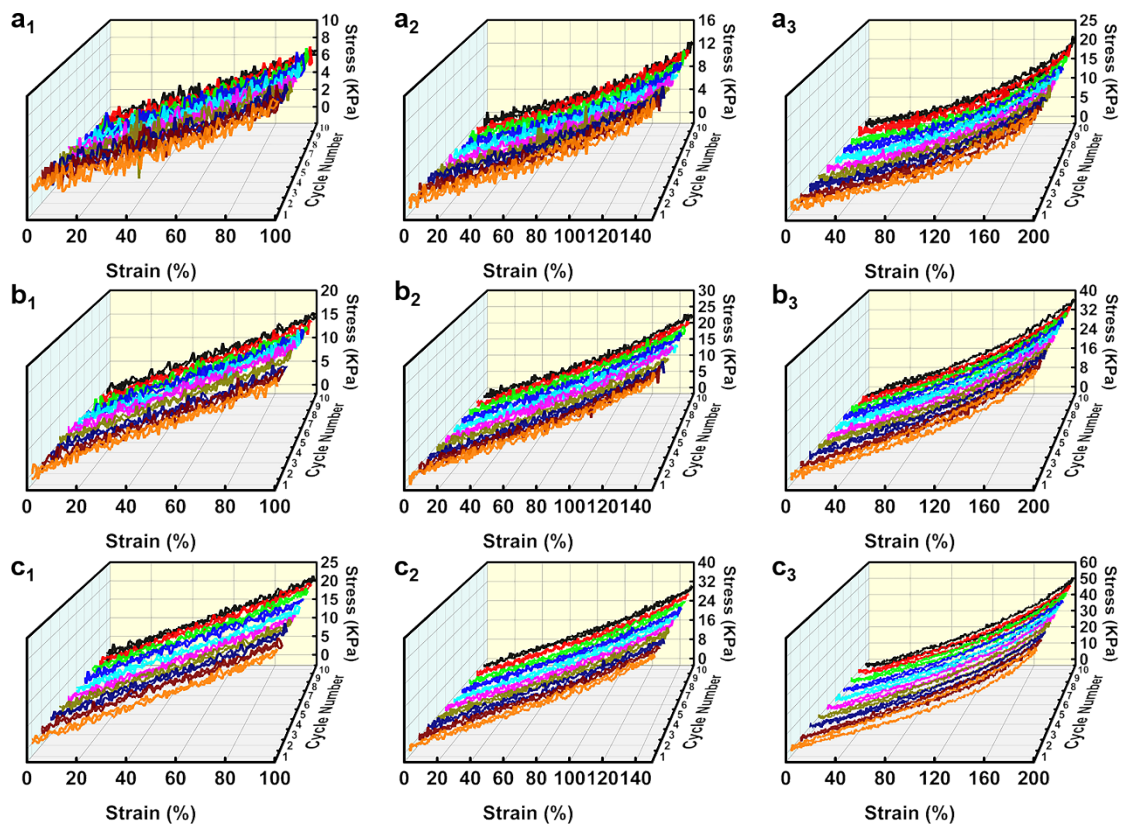

**Supplementary Figure S8.** ( $a_{1,2,3}$ ), ( $b_{1,2,3}$ ), ( $c_{1,2,3}$ ) Loading-unloading curves of  $N_1A_1$ ,  $N_2A_1$  and  $N_3A_1$  at different strain.



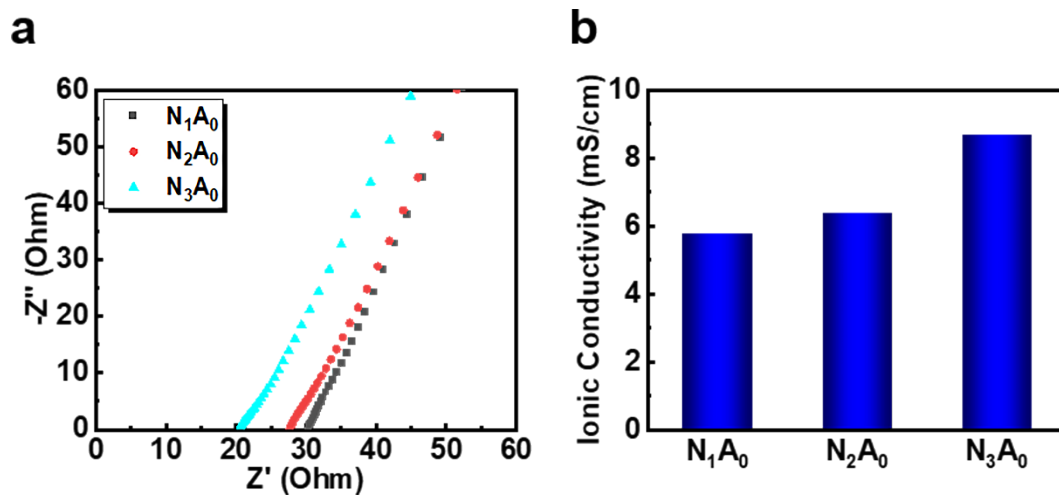

**Supplementary Figure S9.** Anti-freezing properties of  $N_xA_0$  hydrogels: (a) Impedance spectra and (b) ionic conductivity of  $N_3A_0$  at varied temperatures.

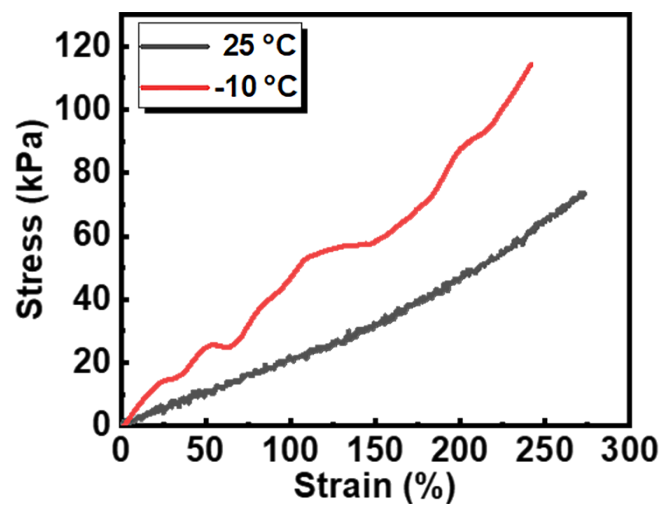

**Supplementary Figure S10.** Stress-strain curves of  $N_3A_1$  hydrogel at different temperature.

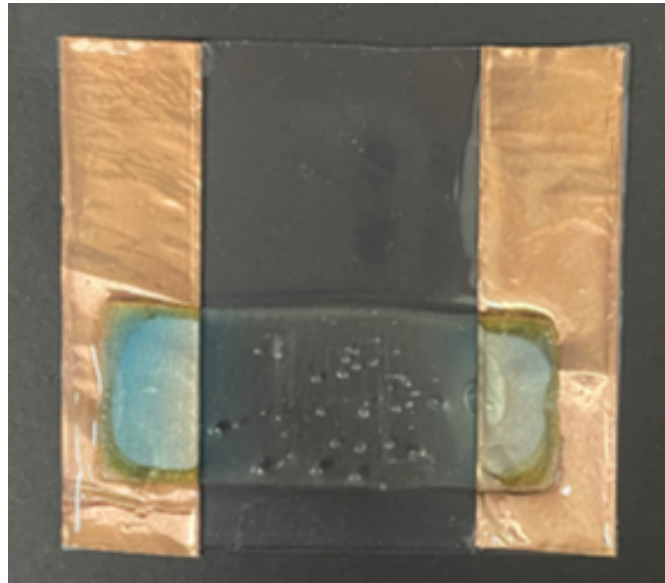

**Supplementary Figure S11.** The image of hydrogel-based temperature sensor.
